# Supplementary material
Source: MDPI journal article supplement (https://www.mdpi.com/2075-4442/10/8/190)
Supplement: s1 [file s1]

Supplementary Materials

# Modified Graphene/Muscovite Nanocomposite as a Lubricant Additive: Tribological Performance and Mechanism

Zhinan Zhao <sup>†</sup>, Yujunwen Li <sup>†</sup>, Wu Lei <sup>\*</sup> and Qingli Hao <sup>\*</sup>

Key Laboratory for Soft Chemistry and Functional Materials, Nanjing University of Science and Technology, Ministry of Education, Xiao Ling Wei 200, Nanjing 210094, China

<sup>\*</sup> Correspondence: leiwuhao@njjust.edu.cn (W.L.); qinglihao@njjust.edu.cn (Q.H.)

<sup>†</sup> These authors contributed equally to this work.

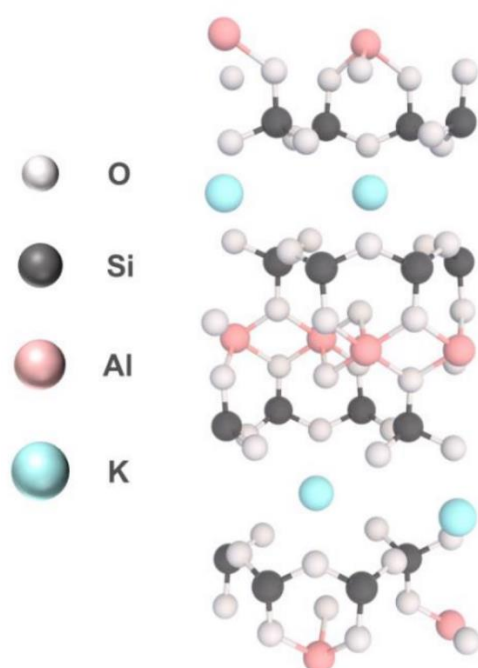

**Figure S1.** The unit layer structure of Muscovite.

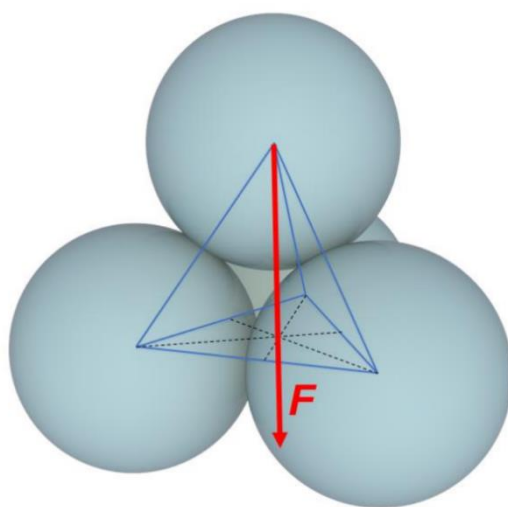

**Figure S2.** The friction pair model of the four-ball friction tester.
